# Supplementary material for: Genetic Evaluation in Natural Populations of the Threatened Conifer Amentotaxus argotaenia (Hance) Pilg. (Taxaceae) Using Microsatellites
Source: MDPI journal article supplement (doi:10.3390/f13091452), 2022-09-09
Supplement: s1 [file s1]

**Table S3.** Pairwise genetic differentiation ( $F_{ST}$ ) between eight *A. argotaenia* populations using GenAlEx 6.5<sup>1</sup>.

| <b>Population</b> | <b>Xuan<br/>Truong</b> | <b>Nam<br/>Chang</b> | <b>Xuan<br/>Son</b> | <b>Liem<br/>Phu</b> | <b>Co Ma</b> | <b>Hang<br/>Kia</b> | <b>Pu<br/>Luong</b> |
|-------------------|------------------------|----------------------|---------------------|---------------------|--------------|---------------------|---------------------|
| Nam Chang         | 0.01                   |                      |                     |                     |              |                     |                     |
| Xuan Son          | 0.018                  | 0.033                |                     |                     |              |                     |                     |
| Liem Phu          | 0.157                  | 0.156                | 0.165               |                     |              |                     |                     |
| Co Ma             | 0.12                   | 0.127                | 0.126               | 0.016               |              |                     |                     |
| Hang Kia          | 0.156                  | 0.172                | 0.165               | 0.043               | 0.022        |                     |                     |
| Pu Luong          | 0.258                  | 0.258                | 0.214               | 0.301               | 0.284        | 0.376               |                     |
| Pu Hoat           | 0.242                  | 0.243                | 0.201               | 0.289               | 0.272        | 0.343               | 0.056               |

<sup>1</sup>Peakall, R.; Smouse, P.E. GenAlEx 6.5: genetic analysis in excel. Population genetic software for teaching and research an update. *Bioinformatics* **2012**, 28, 2537-2539.
