# Supplementary material for: Genetic Evaluation in Natural Populations of the Threatened Conifer Amentotaxus argotaenia (Hance) Pilg. (Taxaceae) Using Microsatellites
Source: MDPI journal article supplement (doi:10.3390/f13091452), 2022-09-09
Supplement: s1 [file s1]

**Table S1.** Collection localities of *Amentotaxus argotaenia*

| <b>Population</b> | <b>Sampling size</b> | <b>Collection locality</b> | <b>Altitude</b> | <b>Latitude</b> | <b>Longitude</b> |
|-------------------|----------------------|----------------------------|-----------------|-----------------|------------------|
| Liem Phu          | 29                   | Van Ban, Lao Cai           | 1476 m          | 21°49'N         | 104°18'E         |
| Xuan Truong       | 26                   | Bao Lac, Cao Bang          | 1059 m          | 22°52'N         | 105°49'E         |
| Hang Kia          | 30                   | Mai Chau, Hoa Binh         | 978 m           | 21°30'N         | 104°51'E         |
| Co Ma             | 23                   | Thuan Chau, Son La         | 1250 m          | 21°20'N         | 103°37'E         |
| Xuan Son          | 21                   | Tan Son, Phu Tho           | 1025 m          | 21°08'N         | 104°56'E         |
| Nam Chang         | 27                   | Na Hang, Tuyen Quang       | 965 m           | 22°21'N         | 105°27'E         |
| Pu Luong          | 19                   | Ba Thuoc, Thanh Hoa        | 1260 m          | 20°29'N         | 105°04'E         |
| Pu Hoat           | 25                   | Que Phong, Nghe An         | 1452 m          | 19°22'N         | 104°26'E         |
