# Supplementary material for: Genetic Evaluation in Natural Populations of the Threatened Conifer Amentotaxus argotaenia (Hance) Pilg. (Taxaceae) Using Microsatellites
Source: MDPI journal article supplement (doi:10.3390/f13091452), 2022-09-09
Supplement: s1 [file s1]

**Table S4.** Percentage of ancestry for eight *A. argotaenia* populations, based on 10 runs at  $K = 2$  and  $K = 3$  in STRUCTURE<sup>1</sup> and compiled in STRUCTURE HARVESTER<sup>2</sup>

$K = 2$ :

| Population  | Genetic group |       |
|-------------|---------------|-------|
|             | I             | II    |
| Xuan Truong | 0.958         | 0.042 |
| Nam Chang   | 0.934         | 0.066 |
| Xuan Son    | 0.823         | 0.177 |
| Liem Phu    | 0.952         | 0.048 |
| Co Ma       | 0.961         | 0.039 |
| Hang Kia    | 0.991         | 0.009 |
| Pu Luong    | 0.050         | 0.950 |
| Pu Hoat     | 0.019         | 0.981 |

$K = 3$ :

| Population  | Genetic group |       |       |
|-------------|---------------|-------|-------|
|             | I             | II    | III   |
| Xuan Truong | 0.035         | 0.874 | 0.092 |
| Nam Chang   | 0.047         | 0.884 | 0.069 |
| Xuan Son    | 0.078         | 0.863 | 0.059 |
| Liem Phu    | 0.040         | 0.102 | 0.858 |
| Co Ma       | 0.050         | 0.101 | 0.848 |
| Hang Kia    | 0.009         | 0.060 | 0.931 |
| Pu Luong    | 0.946         | 0.038 | 0.016 |
| Pu Hoat     | 0.969         | 0.021 | 0.010 |

<sup>1</sup> Pritchard, J.K.; Stephens, M.; Donnelly, P. Inference of population structure using multilocus genotype data. *Genet.* **2000**, 155, 945-959.

<sup>2</sup> Evanno, G.; Regnaut, S.; Goudet, J. Detecting the number of clusters of individuals using the software structure: a simulation study. *Mol. Ecol.* **2005**, 14, 2611-2620.
