# Supplementary material for: Genetic Evaluation in Natural Populations of the Threatened Conifer Amentotaxus argotaenia (Hance) Pilg. (Taxaceae) Using Microsatellites
Source: MDPI journal article supplement (doi:10.3390/f13091452), 2022-09-09
Supplement: s1 [file s1]

**Table S2.** Nucleotide sequences of the SSR primers, allele size range for *A. argotaenia*<sup>1</sup>

| Locus | Nucleotide sequences (5'-3')                                      | Repeat motif                          | T <sub>m</sub> (°C) | PCR product length (bp) |
|-------|-------------------------------------------------------------------|---------------------------------------|---------------------|-------------------------|
| amen1 | F: 5'-TGGATCACGCTGCAACAAC-3'<br>R: 5'-ATGGGGGAGAATGCCCCACG-3'     | (ACA) <sub>8</sub>                    | 57                  | 327-342                 |
| amen2 | F: 5'-CACAGAAACCCACTGTGAC-3'<br>R: 5'-GCACACTATCGCAAAAGGCAC-3'    | (GT) <sub>20</sub>                    | 52                  | 236-254                 |
| amen3 | F: 5'-ACTACAAACCGTTGCATGA-3'<br>R: 5'-ACTACAAACCGTTGCATGA-3'      | (CAA) <sub>15</sub>                   | 55                  | 303-324                 |
| amen4 | F: 5'-GGGGATTAGAAGAAGCGGCA-3'<br>R: 5'-TCAACAGGCTAACCAATGAC-3'    | (GTT) <sub>17</sub>                   | 52                  | 204-222                 |
| amen5 | F: 5'-CAGCCTATTGTCTTGAGGAGG-3'<br>R: 5'-GGACACCCTACAAAACCGTTGC-3' | (TGT) <sub>18</sub>                   | 56                  | 288-297                 |
| amen6 | F: 5'-GGACATTCCAAAAATCGCTGT-3'<br>R: 5'-CCATGGTTGGGTTGACCTTGG-3'  | (CAA) <sub>19</sub>                   | 56                  | 284-293                 |
| amen7 | F: 5'-CCTCCTTTCCATAGAAAACG-3'<br>R: 5'-TCCTATCCATGTTTGGCTCC-3'    | (CA) <sub>25</sub> (CT) <sub>44</sub> | 52                  | 170-206                 |
| amen8 | F: 5'-GGTGTATTAGAAGGCTGAGG-3'<br>R: 5'-CATGAGATGGTCTTCATTGG-3'    | (GA) <sub>65</sub> (GT) <sub>12</sub> | 55                  | 138-166                 |
| amen9 | F: 5'-TCCTTTAAGAGTGACACCTC-3'<br>R: 5'-TGACCCGAGGGTGAGGAATG-3'    | (TC) <sub>38</sub>                    | 55                  | 140-154                 |

Notes: F, forward primer; R, reverse primer; T<sub>m</sub>, PCR annealing temperature

<sup>1</sup> Ho, C.S.; Chen, C.T.; Ko, Y.Z.; Ge, X.J.; Hung, K.H.; Hsu, T.W.; Chiang, Y.C. Isolation and characterization of 15 microsatellite loci in four endangered *Amentotaxus* species (Taxaceae). *Am J Bot.* **2012**, e157-59. doi: 10.3732/ajb.1100452.
