# Supplementary material for: Genetic Evaluation in Natural Populations of the Threatened Conifer Amentotaxus argotaenia (Hance) Pilg. (Taxaceae) Using Microsatellites
Source: MDPI journal article supplement (doi:10.3390/f13091452), 2022-09-09
Supplement: s1 [file s1]

**Table S5.** Number of individuals for each population assigned to a cluster<sup>1</sup>

| <b>Population</b> | <b>Cluster 1</b> | <b>Cluster 2</b> | <b>Cluster 3</b> |
|-------------------|------------------|------------------|------------------|
| Xuan Truong       | 0                | 25               | 1                |
| Nam Chang         | 1                | 25               | 1                |
| Xuan Son          | 0                | 20               | 1                |
| Liem Phu          | 1                | 4                | 24               |
| Co Ma             | 0                | 3                | 20               |
| Hang Kia          | 0                | 0                | 30               |
| Pu Luong          | 18               | 1                | 0                |
| Pu Hoat           | 25               | 0                | 0                |

<sup>1</sup> Jombart, T.; Devillard, S.; Balloux, F. Discriminant analysis of principal components: a new method for the analysis of genetically structured populations. *BMC Genet.* **2010**, 11, 94.
